# Supplementary material for: Combined Oral Administration of Bovine Collagen Peptides with Calcium Citrate Inhibits Bone Loss in Ovariectomized Rats
Source: PLoS One. 2015 Aug 10;10(8):e0135019. doi: 10.1371/journal.pone.0135019 (PMC4530891; doi:10.1371/journal.pone.0135019)
Supplement: S1 Table — (XLSM) [file pone.0135019.s002.xlsm]

## Sheet: Sheet1
Group	Rat Number	initial body weight
		2013.7.9		2013.10.8	2013.10.14	2013.10.21	2013.10.28	2013.11.4	2013.11.11	2013.11.18	2013.11.25	2013.12.2	2013.12.9	2013.12.16	2013.12.23	2013.12.30	2014.1.7( final weight after fast)
Sham	1#	281		337	342	344	345	352	359	344	348	354	350	356	365	361	321
	2#	300		324	335	345	341	336	337	333	337	341	340	340	337	350	316
	3#	290		363	367	373	363	367	362	366	362	342	393	389	383	390	351
	4#	302		386	377	382	378	375	374	380	387	390	387	399	396	408	380
	5#	313		368	372	374	377	372	374	373	373	375	371	370	380	370	350
	6#	295		407	401	399	391	387	378	393	399	400	395	401	414	415	379
	7#	290		376	377	377	385	386	380	391	404	420	414	413	403	403	374
	8#	310		389	385	377	383	372	383	386	387	393	399	399	400	405	379
	9#	307		385	366	369	375	368	367	383	380	383	380	377	391	389	352
OVX	1#	281		403	418	424	437	423	434	439	440	442	443	450	457	462	435
	2#	284		436	445	446	Death	/	/	/	/	/	/	/	/	/
	3#	302		384	386	395	402	406	407	411	415	415	417	419	422	424	400
	4#	283		462	460	459	470	476	479	492	502	509	505	510	523	527	495
	5#	280		454	433	422	433	438	436	447	457	459	459	458	442	469	437
	6#	310		414	419	427	439	445	445	454	466	473	478	483	484	483	467
	7#	279		474	475	492	508	510	518	520	538	528	531	522	523	536	498
	8#	297		474	484	474	484	489	494	500	506	514	493	514	516	520	487
	9#	304		Death	/	/	/	/	/	/	/	/	/	/	/	/
CP	1#	293		403	409	410	415	410	409	408	414	409	412	412	416	420	392
	2#	285		452	450	452	453	457	461	461	461	466	480	480	481	488	465
	3#	276		405	413	409	420	424	429	434	440	437	439	445	451	458	437
	4#	282		475	477	475	478	485	486	494	501	512	509	502	520	516	488
	5#	304		449	454	457	458	461	463	477	482	476	493	492	496	504	476
	6#	308		410	414	409	415	415	420	424	425	430	430	429	436	442	420
	7#	308		421	424	429	430	433	435	442	443	439	445	447	446	449	425
	8#	287		493	495	500	501	498	505	509	514	517	523	522	524	535	510
	9#	308
CP-calcium citrate	1#	302		438	455	452	469	445	463	477	483	484	490	498	490	497	467
	2#	285		432	416	413	421	421	417	427	434	443	448	456	449	476	439
	3#	278		409	410	408	416	417	419	425	434	437	434	440	440	444	415
	4#	315		422	423	436	437	439	444	454	459	460	465	469	473	476	446
	5#	286		428	432	432	437	440	444	449	455	460	468	473	482	486	452
	6#	293		513	526	535	539	540	552	567	574	578	579	591	600	609	576
	7#	304		444	430	439	442	443	439	448	457	449	454	457	462	464	437
	8#	288		427	424	427	428	428	430	431	435	431	416	421	431	438	411
	9#	309
Calcium citrate
	1#	312		440	434	432	435	438	440	427	433	430	440	448	460	445	427
	2#	290		437	435	423	425	432	433	423	429	416	426	434	442	424	407
	3#	295		449	448	450	448	453	453	448	450	445	462	463	471	463	439
	4#	280		423	405	420	424	426	430	437	436	436	436	436	440	442	418
	5#	300		405	400	403	404	407	406	413	417	419	420	421	424	423	406
	6#	279		495	494	498	500	507	500	518	520	508	517	523	523	537	503
	7#	288		403	375	386	372	380	389	388	395	404	398	392	389	408	369
	8#	264		450	468	460	460	461	470	482	477	486	480	485	478	474	429
